# Supplementary material
Source: publisher figshare collection journal article supplement (https://frontiersin.figshare.com/ndownloader/files/28188165)
Supplement: Supplementary file 1 [file 28188165]

Table S2. Traits by taxon matrix for epifauna sampled in the Arctic deep Chukchi Borderland using fuzzy coding
0 indicating no affinity, 1 and 2 indicating partial affinity, and 3 indicating the highest affinity for a given modality
					SIZE					BODY FORM					REPRODUCTION				LARVAL DEVELOPMENT			LIVING HABIT						ADULT MOVEMENT				MOBILITY				FEEDING HABIT						SUBSTRATUM AFFINITY
					< 10 mm	10-50 mm	50-100 mm	100-300 mm	>300 mm	globulose	vermiform	dorso-ventrally compressed	laterally compressed	upright	asexual	sexual-external	sexual internal	sexual-brooder	planktotrophic	lecithotrophic	direct development	free-living	crevice dwelling	tube dwelling	burrow dwelling	eoi/endo zoic/phytic	attached	sessile/none	burrower	crawler	swimmer (facultative)	none	low	medium	high	surface deposit feeder	subsurface deposit feeder	filter/suspension feeder	opportunist/scavenger	predator	parasite/commensal/symbiont	soft	hard	biological	none
Phylum	Class	Order	Family	Taxon	S1	S2	S3	S4	S5	BF1	BF2	BF3	BF4	BF5	R1	R2	R3	R4	LD1	LD2	LD3	LH1	LH2	LH3	LH4	LH5	LH6	MV1	MV2	MV3	MV4	MO1	MO2	MO3	MO4	FH1	FH2	FH3	FH4	FH5	FH6	SA1	SA2	SA3	SA4
Annelida	Polychaeta	Eunicida	Lumbrineridae	Lumbrineridae		3					3					2		2		2	2	2			2				2	2			2	2		1	2		2	2		3
Annelida	Polychaeta	Eunicida	Onuphidae	Nothria sp.		3					3					2		2		1	2			3				2		2			3			2			2	2		2	1
Annelida	Polychaeta	Phyllodocida	Polynoidae	Macellicephala violacea		3					2	2				2	1	1	2		2	3								2	1		1	2		1		2	1	2		3
Annelida	Polychaeta	Phyllodocida	Polynoidae	Macellicephalinae (incl. Macellicephala sp. and Pelagomacellicephala sp.)		3					2	2				2	1	1	2		2	3								1	2			2	2	1		2	1	2		3
Annelida	Polychaeta	Phyllodocida	Nephtyidae	Nephtys sp.		3					3					3			3			2			1				1	2	1			2	1	1			2	2		3
Annelida	Polychaeta	Sabellida	Sabellidae	Sabellidae		3					3				1	2		2		2	2			3				3				3				1		2				2	2	1
Annelida	Polychaeta	Sabellida	Serpulidae	Serpulidae		3					3					2		2		2	2			3				3				2	1					3				2	2	2
Annelida	Polychaeta	Terebellida	Ampharetidae	Ampharetidae		3					3					2		2		2	2			3				3				2	1			2		1				3
Annelida	Polychaeta	Terebellida	Terebellidae	Terebellidae		3					3					2	2	2		2	2			3				2	1			2	1			2		1				2	2	2
Annelida	Polychaeta		Scalibregmatidae	Polyphysia sp.		3					3					3				3		1			2				2	1	1		2	1		1	2					3
Arthropoda	Hexanauplia			Catherinum striolatum		3							1	2			3			3							3	3				3						3				1	2	2
Arthropoda	Malacostraca	Amphipoda	Amathillopsidae	Amathillopsis sp. (incl. A. spinigera)		3					1		2					3			3	3								2	1				3					3		2	2	2	1
Arthropoda	Malacostraca	Amphipoda	Calliopiidae	Halirages sp. (incl. H. qvadridentatus)		3					1		2					3			3	3								1	2				3			1		2		2			1
Arthropoda	Malacostraca	Amphipoda	Calliopiidae	Calliopiidae		3							3					3			3	3									3				3			1		2				2	2
Arthropoda	Malacostraca	Amphipoda	Calliopiidae	Cyclocaris guilelmi		3							3					3			3	3									3				3				2	2					3
Arthropoda	Malacostraca	Amphipoda	Eusiridae	Eusirus holmii		3					1		2					3			3	3									3				3					3					3
Arthropoda	Malacostraca	Amphipoda	Eusiridae	Rhachotropis sp. (incl. R. lomonosovi)		3					1		2					3			3	3								2	2				3					3		2			2
Arthropoda	Malacostraca	Amphipoda	Pardaliscidae	Pardalisca abyssi		3							3					3			3	3									3				3				2	2					3
Arthropoda	Malacostraca	Amphipoda	Stegocephalidae	Stegocephalus sp.		3				1			2					3			3	3								2	2				3	2			2	2		2	2
Arthropoda	Malacostraca	Amphipoda	Uristidae	Anonyx c.f. nugax		3							3					3			3	3								2	2				3				2	2		2	2		2
Arthropoda	Malacostraca	Amphipoda	Uristidae	Tmetonyx cicada		3							3					3			3	3									3				3				3			2			2
Arthropoda	Malacostraca	Amphipoda		Amphipoda		3							3					3			3	3								2	1				3	2			2	2		2	2	2	2
Arthropoda	Malacostraca	Cumacea	Diastylidae	Diastylis sp.		3				1	2							3			3	2			2				2		2		2		1	2		1	1			2	1		1
Arthropoda	Malacostraca	Decapoda	Bythocarididae	Bythocaris biruli			3				2		2			2		2			3	3								2	2				3				2	2		2	1	1
Arthropoda	Malacostraca	Decapoda	Bythocarididae	Bythocaris irene			3				2		2			2		2			3	3								2	2				3				2	2		2	1	1
Arthropoda	Malacostraca	Decapoda	Bythocarididae	Bythocaris spp.			3				2		2			2		2			3	3								2	2				3				2	2		2	1	1
Arthropoda	Malacostraca	Decapoda	Crangonidae	Sclerocrangon boreas			3				2	1	2					3			3	2			2				1	2				3						3		2	2	2
Arthropoda	Malacostraca	Decapoda	Crangonidae	Sclerocrangon ferox		3					2	1	2					3			3	2			2				1	2				3					1	2		2	2	2
Arthropoda	Malacostraca	Decapoda	Oregoniidae	Chionoecetes opilio		3						3						3	3			3								3					3				2	2		3
Arthropoda	Malacostraca	Decapoda	Pandalidae	Pandalus goniurus				3			2		2					3	2	2		3								2	1			2	1				2	2		3
Arthropoda	Malacostraca	Isopoda	Chaetiliidae	Saduria sabini		3					2	2						3			3	3								2	1				3				2	2		3
Arthropoda	Malacostraca	Isopoda	Chaetiliidae	Caecognathia arctica		3						3						3			3	2	1						1	2				3							3	2		2
Arthropoda	Malacostraca	Isopoda	Munnopsidae	Munnopsis sp.		3						3						3			3	3								2	2			2	2	3						2
Arthropoda	Malacostraca	Mysidae		Mysidae		3					2		2					3			3	3								2	2				3			2	2	2		2	2		2
Arthropoda	Malacostraca	Tanaidacea		Tanaidacea		3					3							3			3		1		2				2		1		2	1		2			2	2		3
Arthropoda	Pycnogonida	Pantopoda	Colossendeidae	Colossendeis proboscidea			3				1	2				2		2			3	3								3				3		2			1	2		3
Arthropoda	Pycnogonida	Pantopoda	Nymphonidae	Boreonymphon robustum	3						1	2				2		2			3	3								2	1			3		2			1	2		3
Arthropoda	Pycnogonida	Pantopoda	Nymphonidae	Nymphon macronyx	3						1	2				2		2		2	2	3								2	1			3		2			1	2		3
Arthropoda	Pycnogonida	Pantopoda		Pycnogonida	2	1					1	2				2		2			3	3								2	1			3		2			2	2		2	2
Arthropoda				Crustacea		3					1		2			2	2	2	2	2	2	3								2	2			2	2	2	2	1	2	2		2	2	2
Chordata	Actinopterygii	Gadiformes	Gadidae	Arctogadus glacialis				3			2		2			3				3		3								1	2				3					3		2			2
Chordata	Actinopterygii	Gadiformes	Gadidae	Boreogadus saida			3				2		2			3				3		3								1	2				3					3		2			2
Chordata	Actinopterygii	Perciformes	Zoarcidae	Lycodes adolfi				3			2		2					3			3	3							1	2	2				3					3		3
Chordata	Actinopterygii	Perciformes	Zoarcidae	Lycodes sagittarius				3			2		2					3			3	3							1	2	2				3					3		3
Chordata	Actinopterygii	Perciformes	Zoarcidae	Lycodes spp.				3			2		2					3			3	3							1	2	2				3					3		3
Chordata	Actinopterygii	Pleuronectiformes	Pleuronectidae	Reinhardtius hippoglossoides					3		2	2				3				3		3								1	2				3					3		2			1
Chordata	Actinopterygii	Scorpaeniformes	Cottidae	Triglops pingelii				3			2		2					3			3	3								1	2				3					3		2	1		1
Chordata	Actinopterygii	Scorpaeniformes	Liparidae	Liparis fabricii				3			2		2			3			1	2		3									3				3					3		1			2
Chordata	Actinopterygii	Scorpaeniformes	Psychrolutidae	Rhodichthys regina				3			2		2					3			3	3									3				3					3		1			2
Chordata	Actinopterygii	Scorpaeniformes	Psychrolutidae	Cottunculus microps				3		1	2							3			3	3								1	2				3					3		3
Chordata	Actinopterygii	Scorpaeniformes	Psychrolutidae	Psychrolutes subspinosus				3		1	2							3			3	3								1	2				3					3		2	1
Chordata	Actinopterygii	Scorpaeniformes	Psychrolutidae	Psychrolutidae				3		1	2							3			3	3								1	2				3					3		3
Chordata	Ascidiacea	Phlebobranchia	Ascidiidae	Ascidia callosa		3				1				2		1		2	1		2						3	3				3						3				1	2
Chordata	Ascidiacea	Stolidobranchia	Styelidae	Styela coriacea		3				2				1		3				3							3	3				3				2	1					2	2	2
Chordata	Ascidiacea	Phlebobranchia	Corellidae	Corella willmeriana				3						3		3				3							3	3				3						3				2	2
Chordata	Ascidiacea	Phlebobranchia	Corellidae	Ciona sp.			3			1				2		3				3							3	3				3						3				3
Chordata	Ascidiacea			Ascidiacea	2	2				1	1			2	1	2	1	2		2	2						3	3				3						3				2	2	1
Chordata	Elasmobranchii	Rajiformes	Rajidae	Amblyraja hyperborea				3			1	2					3				3	3								1	2				3					3		3
Cnidaria	Anthozoa	Actiniaria	Actinostolidae	Actinostola callosa		3				1				2	2	2		2		2	2						3	3				3						2		2		2	2
Cnidaria	Anthozoa	Actiniaria	Actinostolidae	Tealidium sp.c.f.		3				1				2	2	2		2		2	2						3	3				3						2		2		3
Cnidaria	Anthozoa	Actiniaria	Hormathiidae	Allantactis parasitica		3				1				2		3				3						2	2	3				2	2					2			1		2	2
Cnidaria	Anthozoa	Actiniaria	Hormathiidae	Hormathia digitata		3				1				2				3			3						3	3				3						1		2			2	2
Cnidaria	Anthozoa	Actiniaria	Hormathiidae	Hormathiidae		3				1				2	2	2		2		2	2						3	3				3						2		2			2	2
Cnidaria	Anthozoa	Actiniaria	Amphianthidae	Amphianthus sp.	3					2				1	2	2			1	2							3	3				3						3					2	2
Cnidaria	Anthozoa	Actiniaria	Actinostolidae	Pycnanthus densus				3		1				2	2	2		2		2	2						3	3				3						2		2		3
Cnidaria	Anthozoa	Actiniaria	Bathyphelliidae	Bathyphellia margaritacea c.f.	2	2				2	2			1	2	2		2		2	2						3	3				3						3				2	2
Cnidaria	Anthozoa	Actiniaria		Actiniaria		3				1				2	2	2		2		2	2						3	3				2	1					2		2		2	2
Cnidaria	Anthozoa	Alcyonacea	Nephtheidae	Gersemia sp.		3								3	1	2		2		2	2						3	3				3				1		2				2	2
Cnidaria	Anthozoa	Spirularia	Cerianthidae	Cerianthus sp.		3					2			2	2	2			2		2			1	2				3				3					2		2		3
Cnidaria	Anthozoa	Zoantharia		Zoantharia		3				1	2			1	2	1		1	1	1	2	2			1			2	1			3						3				2	2	2
Echinodermata	Asteroidea	Paxillosida	Astropectinidae	Bathybiaster vexillifer		3						3				3				3		2			1				1	2				3						3		3
Echinodermata	Asteroidea	Valvatida	Solasteridae	Crossaster sp.				3				3				3				3		3								3				3					2	2		3
Echinodermata	Asteroidea	Velatida	Pterasteridae	Hymenaster pellucidus	2	2						3						3			3	3								3				3		1				2		3
Echinodermata	Asteroidea	Forcipulatida	Asteriidae	Icasterias panopla			3					3				2		1	1	2	1	3								3				3		1			2	2		2	1
Echinodermata	Asteroidea	Forcipulatida	Pedicellasteridae	Pedicellaster typicus		3						3			1	2		1			3	3								3				3		1			2	2		1	2
Echinodermata	Asteroidea	Notomyotida	Benthopectinidae	Pontaster tenuispinus			3					3				3				2	1	3								3				3		3						3
Echinodermata	Asteroidea	Valvatida	Poraniidae	Poraniopsis inflata		3						3				2		1	1	2	1	3								3				3						3		3
Echinodermata	Asteroidea	Valvatida	Poraniidae	Poraniomorpha (Poraniomorpha) tumida		3						3				2		1		3		3								3				3					2	2		2	2
Echinodermata	Asteroidea			Asteroidea		3						3				2		1	1	2	1	2			1				1	2				3		1			2	2		2	2
Echinodermata	Crinoidea	Comatulida	Bathycrinidae	Bathycrinus carpenterii		3								3		3				3		1					2	2		1		2	1					3				2	2
Echinodermata	Crinoidea	Comatulida	Antedonidae	Poliometra prolixa c.f.	3									3		2		1		2	1	1					2	2			2	2			2			3				3
Echinodermata	Echinoidea	Holasteroida	Pourtalesiidae	Pourtalesia jeffreysi		3				1	2					3				3		2			2				2	2			3			1	2					3
Echinodermata	Holothuroidea	Elasipodida	Elpidiidae	Elpidia sp.		3				1	2					3				3		3								3				3		2			1			3
Echinodermata	Holothuroidea	Elasipodida	Elpidiidae	Kolga c.f. hyalina			3			1	2					3				3		3								2	1			3	1	2			1			3
Echinodermata	Ophiuroidea	Ophiacanthida	Ophiacanthidae	Ophiacantha bidentata		3						3				3				3		3								3				2	1	2		1	1			2	1
Echinodermata	Ophiuroidea	Ophiurida	Ophiuridae	Ophiocten sericeum	3							3				3			3			3								3				2	1	2			2	2		3
Echinodermata	Ophiuroidea	Ophiurida	Ophiopyrgidae	Ophiopleura borealis		3						3				3				3		3								3				2	1	2			2	2		3
Echinodermata	Ophiuroidea	Ophioscolecida	Ophioscolecidae	Ophioscolex glacialis		3						3				3					3	3								3				2	1				2	2		3
Echinodermata	Ophiuroidea	Ophioleucida	Ophioleucidae	Ophiostriatus striatus	3							3				2		1		2	2	3								2	2			2	2	2			1			3
Echinodermata	Ophiuroidea			Ophiuroidea	3							3				2		2	1	2	2	2			1				1	2				2	1	2		1	2	2		2	2
Mollusca	Bivalvia	Arcida	Arcidae	Bathyarca c.f. imitata	3								3			2	1	1		3							3	3				3						3					3
Mollusca	Bivalvia		Cuspidariidae	Rhinoclama filatovae		3							3			2	1	1		3		3							3				3							3		3
Mollusca	Bivalvia	Nuculida	Nuculidae	Nucula zophos		3							3			3				3		3							3				3				3					3
Mollusca	Bivalvia	Pectinida	Pectinidae	Hyalopecten c.f. frigidus		3							3			2	1	1		3		2					2	2			1	2	1	1				3				2	2
Mollusca	Bivalvia			Bivalvia		3							3			2	1	1	1	2		2			1			2	2			2	2			2	2	1				3
Mollusca	Gastropoda	Cephalaspidea	Philinidae	Philine sp.	2	1					2	2					3				3				3				3				3						2	2		3
Mollusca	Gastropoda	Neogastropoda	Buccinidae	Colus sabini		3				2	2						3				3	3								3			3						2	2		3
Mollusca	Gastropoda	Neogastropoda	Buccinidae	Turrisipho lachesis			3			2	2						3				3	3								3			3							3		2	1
Mollusca	Gastropoda	Neogastropoda	Buccinidae	Buccinidae		2	1			2	2						3		1	1	2	3								3			3						2	2		2	1
Mollusca	Scaphopoda	Gadilida	Gadilidae	Siphonodentalium lobatum		3					3					3				3					3				3				3				2			2		3
Mollusca	Solenogastres	Neomeniamorpha	Neomeniidae	Neomenia yamamatoi c.f.		3					3						2	2		3		2				2				3			3							2	1	2		2
Nemertea				Nemertea		3					3				1	2	1		2	2	2	2	1		1				1	2	2			2	1				2	2	1	2	2	1
Porifera	Calcarea	Leucosolenida	Grantiidae	Grantia phillipsi		3				1				2	2		2			2	2						3	3				3						3				3
Porifera	Demospongiae	Polymastiida	Polymastiidae	Polymastia sp.		3				2		1			2		2			2	2				1		2	3				3						3				2	2
Porifera	Demospongiae	Polymastiida	Polymastiidae	Radiella sol		3				2		2			2		2			2	2				1		2	3				3						3				2	2
Porifera	Demospongiae	Polymastiida	Polymastiidae	Tentorium semisuberites	3					1				2	2		2			2	2						3	3				3						3				2	2	1
Porifera				Porifera		3				2		2			2		2			2	2						3	3				3						2		1		2	2	1
Sipuncula				Phascolion		3					3									3		3							2	2			3			3						2	2
Cnidaria	Scyphozoa	Coronatae		Polyps of Coronatae	2	2								3	3						3						3	3				3								3			3
